# Supplementary material
Source: PubMed Central journal article supplement (PMC3251754)
Supplement: NIHMS344679-supplement-01.pdf [file NIHMS344679-supplement-01.pdf]

Supplementary table 1: Association between SNPs (*genotype*) and BMI (*outcome*) adjusted for lifestyle factors (*mediators*) in the overall analysis (men and women combined) – model 4

| SNP        | Gene   | Carbohydrate score            |                       | Fat score                     |                       | Alcohol consumption           |                       | Smoking behaviour             |                       | Physical activity             |                       | All lifestyle factors         |                       |
|------------|--------|-------------------------------|-----------------------|-------------------------------|-----------------------|-------------------------------|-----------------------|-------------------------------|-----------------------|-------------------------------|-----------------------|-------------------------------|-----------------------|
|            |        | Estimate [kg/m <sup>2</sup> ] | P-value               |
| rs10789336 | NEGR1  | -0.033                        | 0.56                  | -0.038                        | 0.50                  | -0.042                        | 0.45                  | -0.035                        | 0.53                  | -0.040                        | 0.48                  | -0.049                        | 0.38                  |
| rs6548238  | TMEM18 | -0.414                        | 1.63x10 <sup>-8</sup> | -0.410                        | 2.15x10 <sup>-8</sup> | -0.417                        | 1.33x10 <sup>-8</sup> | -0.421                        | 9.57x10 <sup>-9</sup> | -0.412                        | 1.66x10 <sup>-8</sup> | -0.407                        | 2.29x10 <sup>-8</sup> |
| rs10838738 | MTCH2  | -0.068                        | 0.25                  | -0.068                        | 0.24                  | -0.066                        | 0.26                  | -0.067                        | 0.25                  | -0.057                        | 0.33                  | -0.063                        | 0.27                  |
| rs9935401  | FTO    | 0.290                         | 2.65x10 <sup>-7</sup> | 0.292                         | 2.25x10 <sup>-7</sup> | 0.289                         | 3.05x10 <sup>-7</sup> | 0.286                         | 4.03x10 <sup>-7</sup> | 0.287                         | 3.10x10 <sup>-7</sup> | 0.278                         | 6.97x10 <sup>-7</sup> |
| rs17700144 | MC4R   | 0.104                         | 0.12                  | 0.099                         | 0.14                  | 0.101                         | 0.13                  | 0.102                         | 0.13                  | 0.101                         | 0.13                  | 0.107                         | 0.11                  |
| rs7498665  | SH2B1  | 0.144                         | 0.01                  | 0.139                         | 0.01                  | 0.141                         | 0.01                  | 0.147                         | 9.10x10 <sup>-3</sup> | 0.135                         | 0.02                  | 0.133                         | 0.02                  |
| rs11084753 | KCTD15 | 0.018                         | 0.76                  | 0.020                         | 0.74                  | 0.012                         | 0.83                  | 0.013                         | 0.83                  | 0.007                         | 0.90                  | 0.020                         | 0.72                  |

Estimates and p-values from linear regression of the association between SNP (per minor allele) and BMI, adjusted for age, sex, survey, and one or all of the lifestyle factor
